# Supplementary material for: Novel PLGA-based nanoformulation decreases doxorubicin-induced cardiotoxicity
Source: Royal Society of Chemistry journal article supplement (doi:10.1039/d3nr06269d), 2024-01-01
Supplement: d3nr06269d1.pdf [file d3nr06269d1.pdf]

## Supplementary Materials

for

# Novel PLGA-based Nanoformulation Decreases Doxorubicin-Induced Cardiotoxicity

### Physicochemical characterization of nanoformulations

Nanoformulations of lipoDOX and PLGADOX were visualized by transmission electron microscopy (TEM) using the JEM1010 microscope (Jeol, Japan) equipped with a MegaView CCD camera (Olympus, Japan)

. Images were captured using a bright-field mode with an acceleration voltage of 80 kV. The samples were prepared by droplet deposition on a Formvar®-coated copper grid. Dynamic light scattering (DLS) and electrophoretic light scattering (ELS) were performed on the Zetasizer Nano ZS (Malvern Instruments, Malvern, UK) to evaluate the hydrodynamic diameter ( $d_H$ ) and zeta ( $\zeta$ ) potential values, respectively.  $d_H$  was measured using a green laser (532 nm), at a detection angle of 173°. 10 measurements were performed to obtain average  $d_H$  by the intensity distribution function.  $\zeta$  potential was determined from the measured electrophoretic mobility using the Henry equation with Smoluchowski approximation, and the average of 3 measurements is reported. Both DLS and ELS measurements were conducted at 25 °C after a 50-fold dilution of the samples in saline. All data were processed using the Zetasizer software (6.32; Malvern Instruments, Malvern, UK).

**Table S1.** Description of dehydration procedure for rat heart tissues with indicated reagents and times of incubation.

| Reagent        | Duration  |
|----------------|-----------|
| 50 % ethanol 1 | 1 h       |
| 50 % ethanol 2 | 1 h       |
| 70 % ethanol   | overnight |
| 96 % ethanol 1 | 1 h       |
| 96 % ethanol 2 | 1 h       |
| 100 % ethanol  | overnight |

**Table S2.** Description of embedding procedure for rat heart tissues with indicated reagents and times of incubation.

| Reagent             | Duration |
|---------------------|----------|
| Xylen:ethanol (1:1) | 1.5 h    |
| Xylen 1             | 1h       |
| Xylen 2             | 1h       |
| Paraffin 1          | 1.5 h    |
| Paraffin 2          | 1.5 h    |
| Paraffin 3          | 2 h      |
| Paraffin 4          | 3 h      |

**Table S3.** Standard staining procedure for hematoxylin and eosin (H&E).

| Reagent           | Duration |
|-------------------|----------|
| Xylen 1           | 5'       |
| Xylen 2           | 5'       |
| 100 % ethanol     | 2 x 5'   |
| 96% ethanol       | 2'       |
| 70% ethanol       | 2'       |
| Distilled water   | 2 x 2'   |
| Hematoxylin H     | 3'       |
| Distilled water   | One dip  |
| Running tap water | 3'       |
| Distilled water   | One dip  |
| Eosin 1%          | 2'       |
| Distilled water   | 2'       |
| 70% ethanol       | 2'       |
| 96% ethanol       | 2'       |
| 100 % ethanol     | 2'       |
| Xylen 3           | 2'       |
| Xylen 4           | 2'       |
| BioMount          |          |
